# Supplementary material
Source: HighWire-hosted journal article supplement (https://bmjopen.bmj.com/content/7/8/e014224)
Supplement: inline-supplementary-material-1 [file inline-supplementary-material-1.pdf]

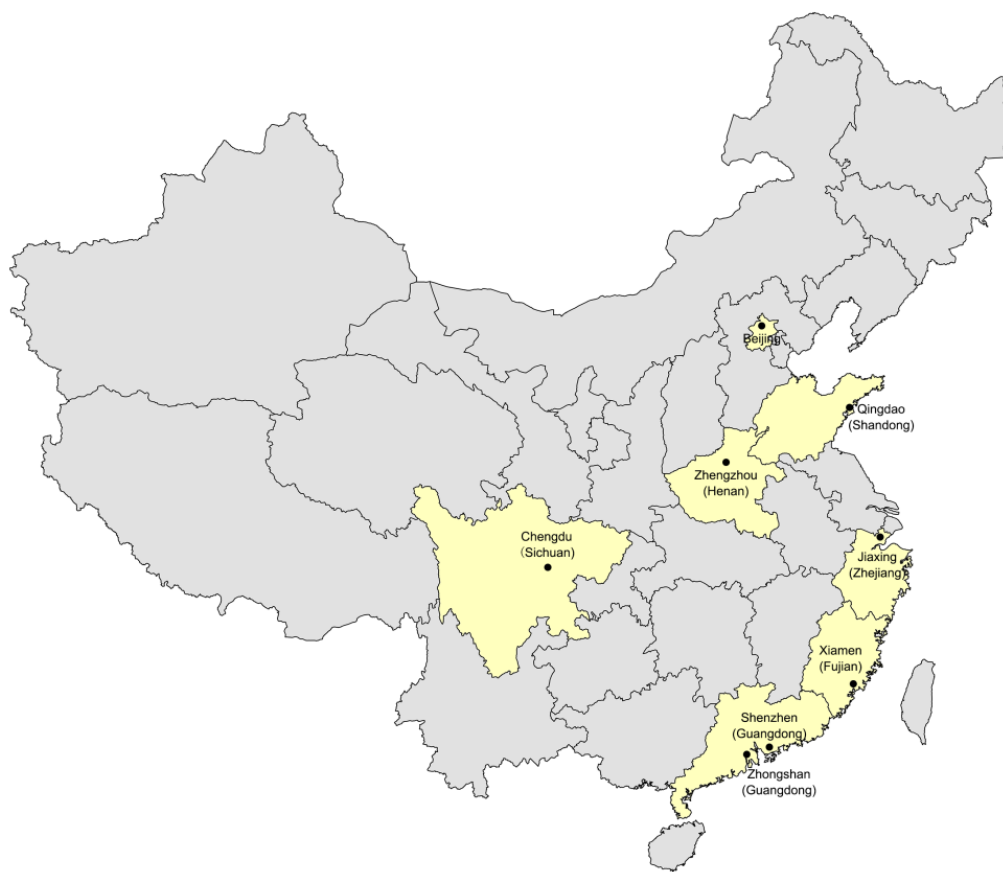

**Appendix Figure 1. Sampled Cities in the National Internal Migrant Population Dynamic Monitoring Survey (NIMPDMS)**
