# Supplementary material
Source: HighWire-hosted journal article supplement (https://bmjopen.bmj.com/content/7/8/e014224)
Supplement: inline-supplementary-material-2 [file inline-supplementary-material-2.pdf]

**Appendix Table 1. Multinomial Logit Regressions of the Association between Structural Social Capital, Neighborhood Characteristics and Contents of Health Education Received: the 2014 National Internal Migrant Population Dynamic Monitoring Survey (n=15,999)**

| Variables                                                                         | No interaction            |                           | Interaction with neighborhood composition |                           | Interaction with community urban status |                           |
|-----------------------------------------------------------------------------------|---------------------------|---------------------------|-------------------------------------------|---------------------------|-----------------------------------------|---------------------------|
|                                                                                   | Infectious diseases       | Infectious diseases & NCD | Infectious diseases                       | Infectious diseases & NCD | Infectious diseases                     | Infectious diseases & NCD |
| <b><i>Structural Social Capital</i></b>                                           |                           |                           |                                           |                           |                                         |                           |
| Participating in social organization                                              | 1.550***<br>(1.294-1.857) | 1.850***<br>(1.558-2.197) | 1.555***<br>(1.285-1.882)                 | 1.990***<br>(1.660-2.386) | 1.456*<br>(1.037-2.045)                 | 2.179***<br>(1.499-3.167) |
| Participating in social activity                                                  | 3.030***<br>(2.509-3.658) | 5.086***<br>(4.211-6.142) | 2.860***<br>(2.335-3.504)                 | 4.749***<br>(3.888-5.800) | 2.864***<br>(2.017-4.065)               | 5.619***<br>(3.825-8.254) |
| <b><i>Neighborhood Characteristics</i></b>                                        |                           |                           |                                           |                           |                                         |                           |
| >50% neighbors are local residents                                                | 1.147<br>(0.933-1.410)    | 1.273*<br>(1.041-1.557)   | 1.071<br>(0.838-1.368)                    | 1.269<br>(0.989-1.628)    | 1.144<br>(0.931-1.406)                  | 1.277*<br>(1.044-1.561)   |
| Living in urban communities                                                       | 0.858<br>(0.654-1.124)    | 1.564**<br>(1.188-2.059)  | 0.855<br>(0.652-1.121)                    | 1.568**<br>(1.190-2.066)  | 0.811<br>(0.598-1.100)                  | 1.730***<br>(1.273-2.351) |
| <b><i>Interaction between Social Capital and Neighborhood Characteristics</i></b> |                           |                           |                                           |                           |                                         |                           |
| Participating in social organization *                                            |                           |                           | 0.945<br>(0.627-1.425)                    | 0.691<br>(0.470-1.015)    |                                         |                           |
| >50% neighbors are local residents                                                |                           |                           |                                           |                           |                                         |                           |
| Participating in social activity *                                                |                           |                           | 1.376<br>(0.937-2.019)                    | 1.441*<br>(1.002-2.071)   |                                         |                           |
| >50% neighbors are local residents                                                |                           |                           |                                           |                           |                                         |                           |
| Participating in social organization *                                            |                           |                           |                                           |                           | 1.083<br>(0.723-1.622)                  | 0.815<br>(0.537-1.236)    |
| Living in urban communities                                                       |                           |                           |                                           |                           |                                         |                           |
| Participating in social activity *                                                |                           |                           |                                           |                           | 1.079<br>(0.712-1.637)                  | 0.886<br>(0.570-1.378)    |
| Living in urban communities                                                       |                           |                           |                                           |                           |                                         |                           |
| Observations                                                                      | 15,999                    | 15,999                    | 15,999                                    | 15,999                    | 15,999                                  | 15,999                    |

Notes: Odds ratio and 95% confidence intervals were shown. Survey weights adjusted. “No health education” was the base outcome. All models include the same covariates as shown in Table 3 and Table 4. Significance level: \*\*\* p<0.001, \*\* p<0.01, \* p<0.05
